# Supplementary material
Source: MDPI journal article supplement (https://www.mdpi.com/1424-8247/15/10/1216)
Supplement: s1 [file s1]

## Supplementary-Information:

# Biocompatible, Multi-Mode, Fluorescent, T2 MRI Contrast Magnetoelectric-Silica Nanoparticles (MagSiNs), for On Demand Doxorubicin Delivery to Metastatic Cancer Cells.

Margo Waters <sup>1,2†</sup>, Juliane Hopf <sup>2,†</sup>, Emma Tam <sup>2,3</sup>, Stephanie Wallace <sup>2,4</sup>, Jordan Chang <sup>1,2</sup>, Zach Bennett <sup>2,5</sup>, Hadrian Aquino <sup>6</sup>, Ryan K. Roeder <sup>7</sup>, Paul Helquist <sup>8</sup>, M. Sharon Stack <sup>2,9</sup> and Prakash D. Nallathamby <sup>2,7,9,\*</sup>

<sup>1</sup> Dept. of Pre-Professional Studies, University of Notre Dame, Notre Dame, IN, 46556 USA;

<sup>2</sup> The Berthiaume Institute for Precision Health, University of Notre Dame, Notre Dame, IN, 46556 USA;

<sup>3</sup> Department of Art, Art History & Design, University of Notre Dame, Notre Dame, IN, 46556 USA

<sup>4</sup> Department of Mathematics and Pre-Professional Studies, University of Notre Dame, Notre Dame, IN, 46556 USA

<sup>5</sup> Department of Aerospace and Mechanical Engineering, University of Notre Dame, Notre Dame, IN, 46556 USA

<sup>6</sup> Electrical Engineering, University of Notre Dame, Notre Dame, IN, 46556 USA;

<sup>7</sup> Bioengineering Program in the Department of Aerospace and Mechanical Engineering, University of Notre Dame, Notre Dame, IN, 46556 USA;

<sup>8</sup> Department of Chemistry and Biochemistry, University of Notre Dame, Notre Dame, IN, 46556 USA;

<sup>9</sup> Harper Cancer Research Institute, University of Notre Dame, Notre Dame, IN, 46556 USA

\* Correspondence: pnallath@nd.edu; Tel.: +1-(574)-631-7868

† These authors contributed equally to this work.

**Keywords:** magnetoelectric; T2-contrast; fluorescent nanoparticle; cobalt ferrite; silica shell; ON-Demand drug delivery; stimuli responsive drug delivery; doxorubicin; off-target toxicity

**Figure S 1:** Magnetoelectric nanoparticles synthesized according to existing protocols in peer-reviewed literature [Rodzinski, A.; Guduru, R.; Liang, P.; Hadjikhani, A.; Stewart, T.; Stimphil, E.; Runowicz, C.; Cote, R.; Altman, N.; Datar, R.; Khizroev, S., Targeted and controlled anticancer drug delivery and release with magnetoelectric nanoparticles. *Sci Rep* **2016**, *6*, 20867]

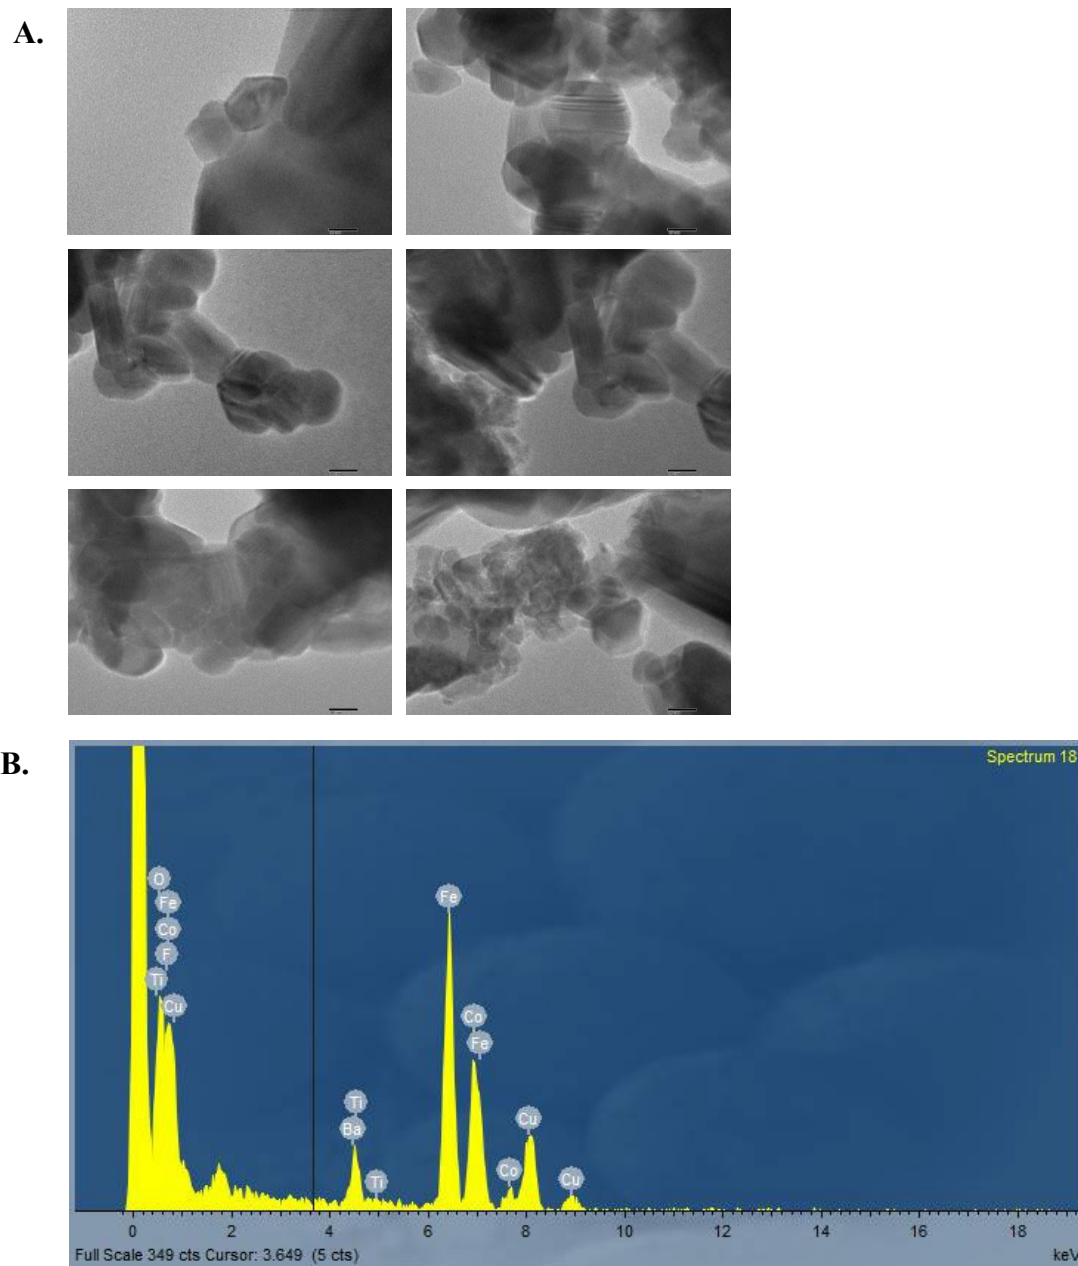

**(A)** Magnetoelectric nanoparticles with a cobalt ferrite core and a barium titanate piezoelectric shell had net diameters larger than 40 nm. It was quite hard to control the thickness of the barium titanate shell consistently. **(B)** EDXS was used to confirm the elemental composition of the MENs magnetoelectric nanoparticles.

**Figures S2:** Fluorescence Calibration curve used to estimate FITC release from MagSiNs

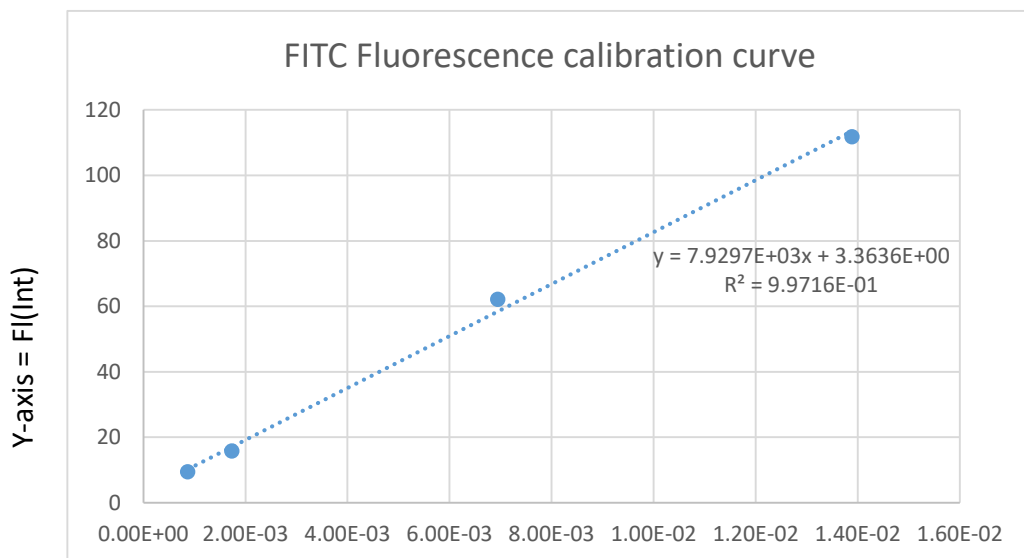

X-axis = mg/mL of Fluorophore

- Excitation wavelength (nm) 494;
- Emission wavelength (nm) 518
- Ex slit (nm) 2.5 nm; Em slit (nm) 2.5 nm

**Figures S3: Different modes of Drug Loading and Release**

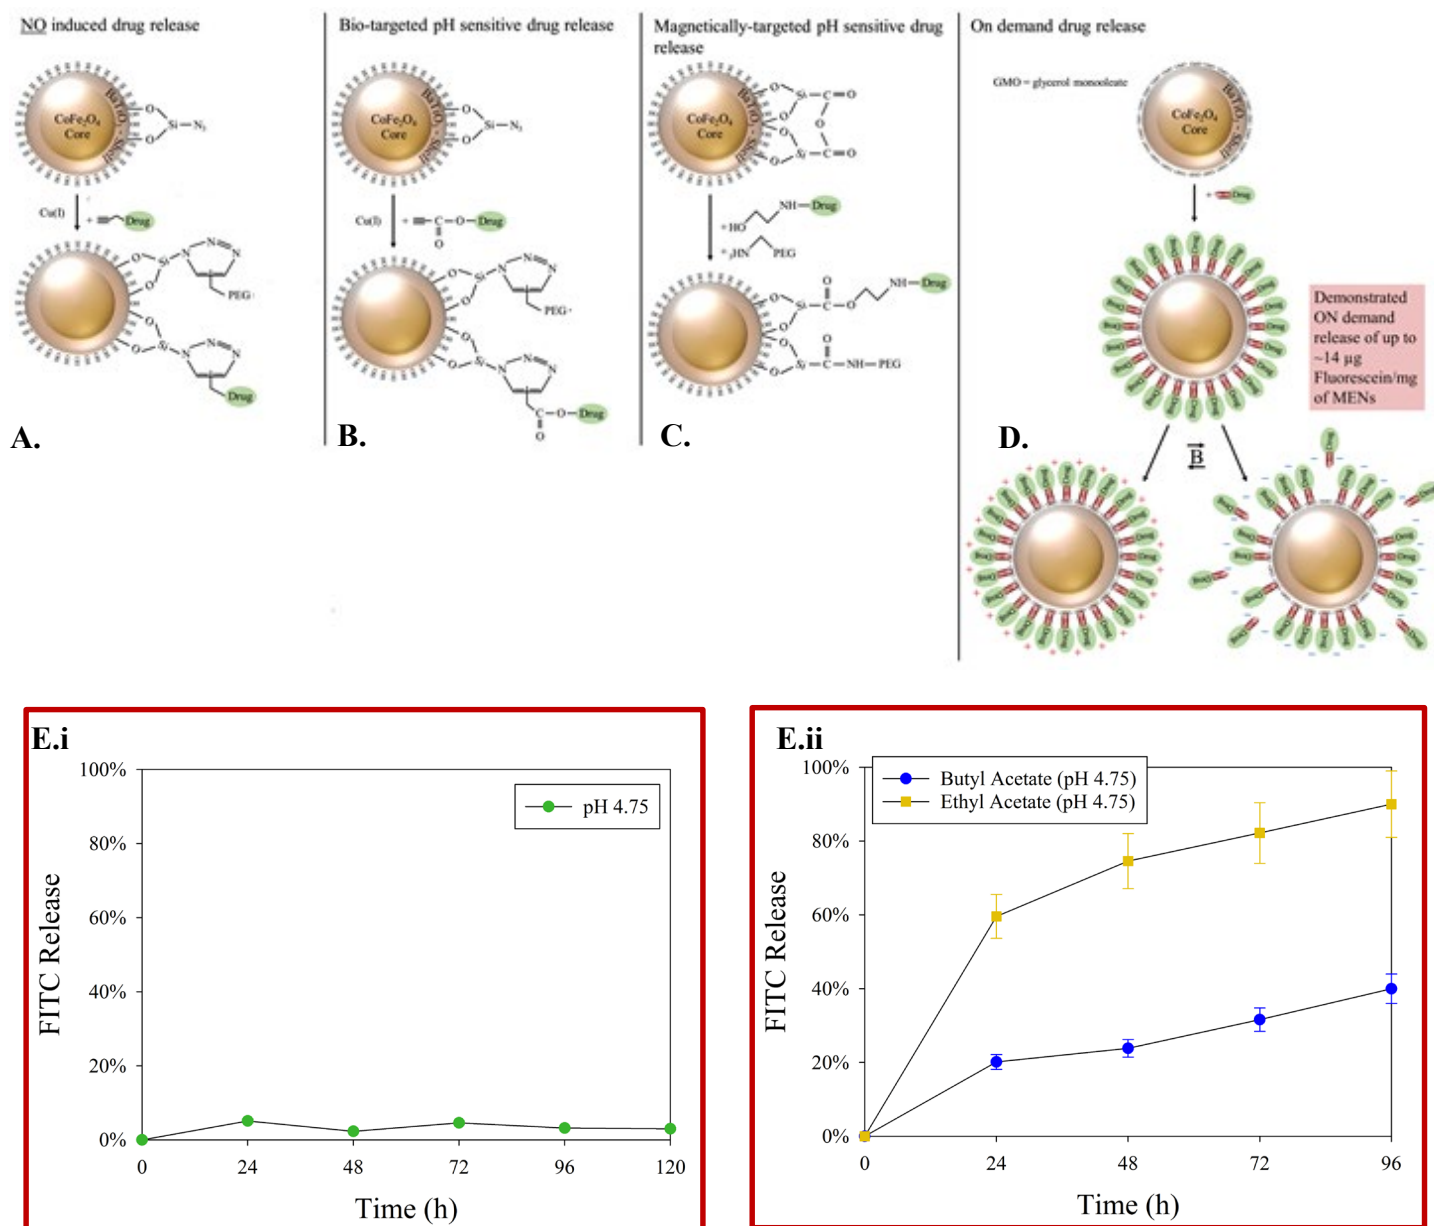

Listed are the other modes of drug delivery that were explored. **(A)** Using CLICK chemistry to link the drug molecule covalently to the MagSiNs to see if the drug was still therapeutically active while conjugated to the MagSiNs surface. **(B)** Using acid-labile ester linkers to release the drug payload from MagSiNs. An additional antibody for increased targeting to cancer cells was also conjugated to the MagSiNs. **(C)** Using acid-labile ester linkers to release the drug payload from MagSiNs. Magnetic field was used for targeting MagSiNs to target cells. **(D)** Electrostatic loading of drugs on MagSiNs followed by electromagnetic release of the drug payload. **(E.i)** The high stability of covalently bound FITC to MagSiNs surface at acidic pH 4.75, over 5-days at 37°C and 5% CO<sub>2</sub>. **(E.ii)** The release rate of FITC bound to MagSiNs using acid-labile ester linkers as a function of the length of the carbon spacer (2-carbon or 4-carbon) linking the FITC to the ester functional group at acidic pH 4.75, over 4-days at 37°C and 5% CO<sub>2</sub>.

**Figure S4:** Electromagnet array used for exposing cells to unidirectional magnetic field by passing a DC current or an alternating magnetic field by passing an AC current through the electromagnet array.

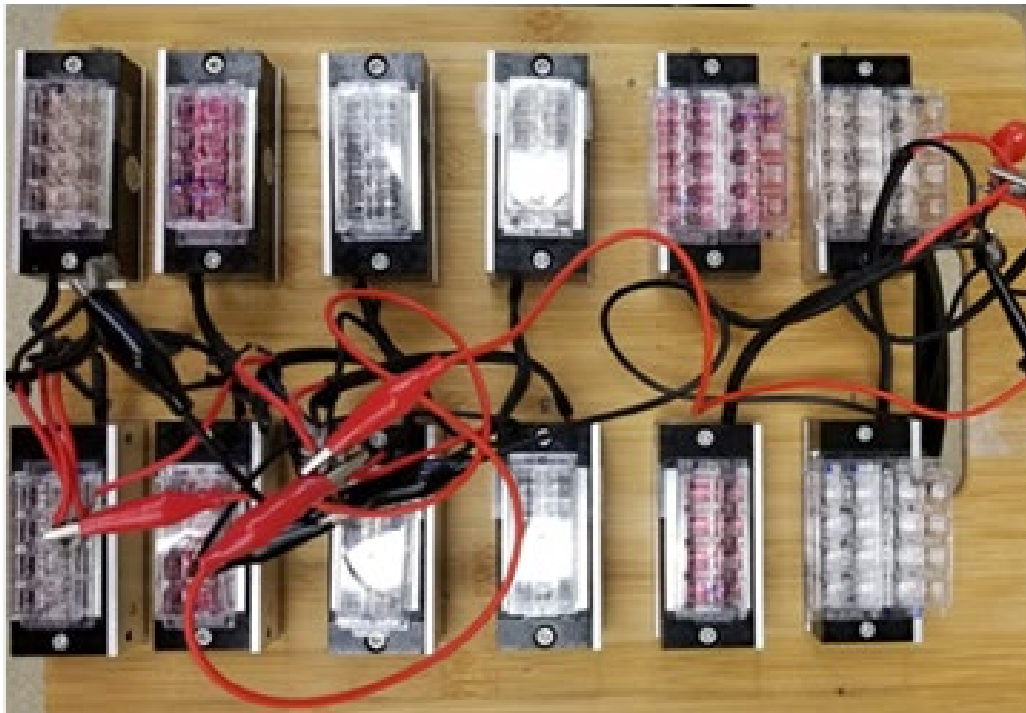

Hewlett-Packard 33120A Waveform Generator

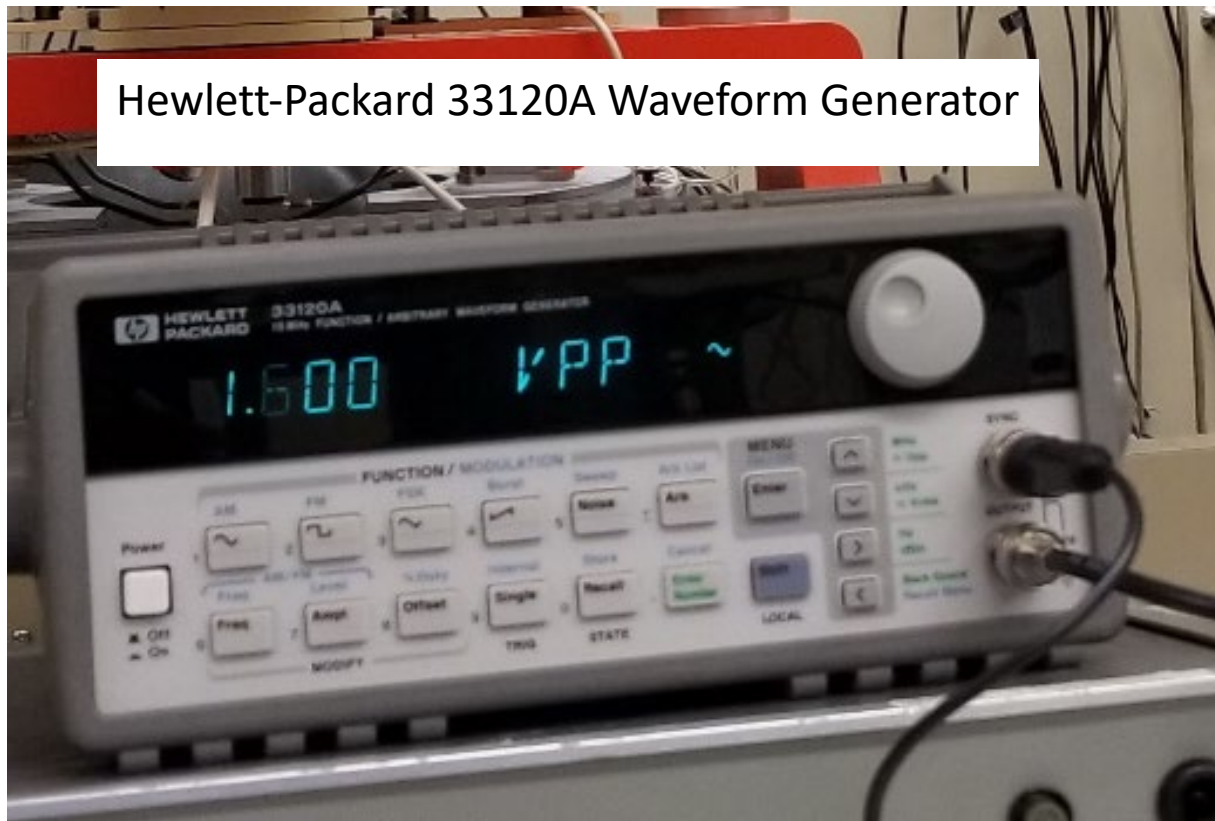

## KROHN-HITE Model 7500 Voltage amplifier

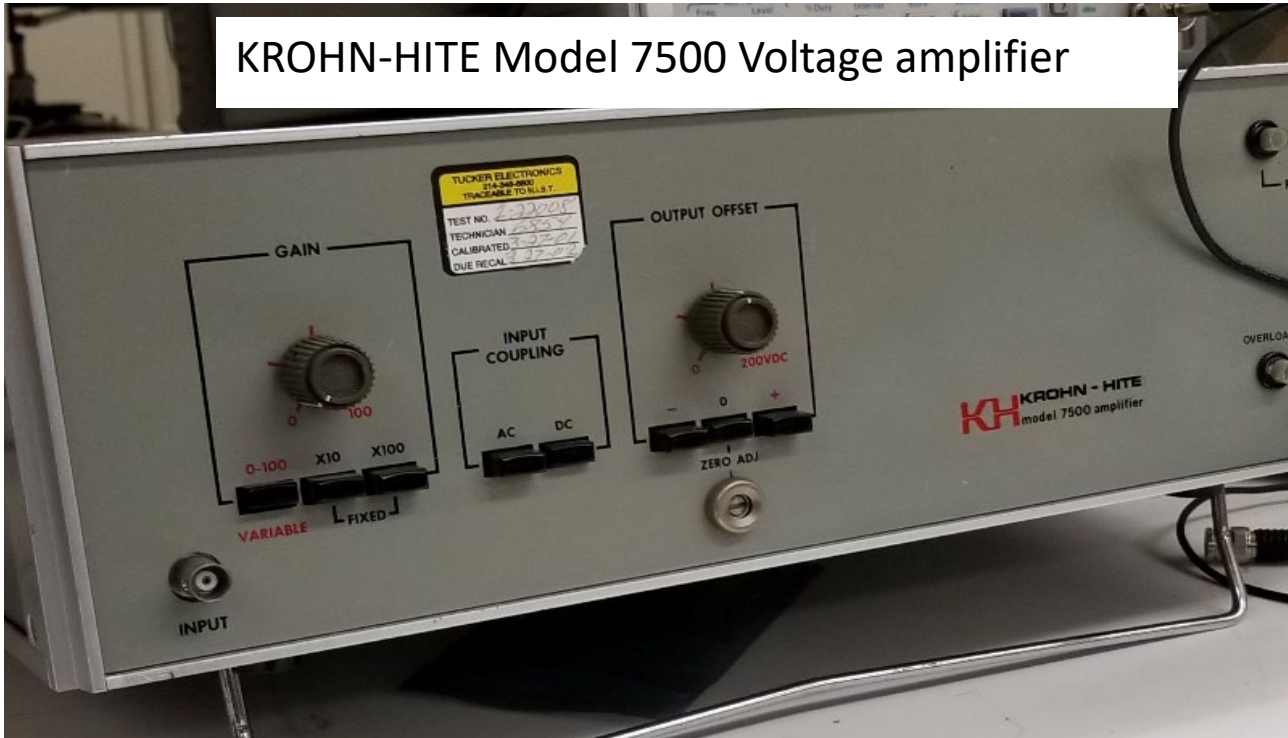

The electromagnet array was connected in series. A waveform generator (Hewlett-Packard 33120A) was used to deliver the appropriate signal waveform to a voltage amplifier (KROHN-HITE Model 7500). The amplified signal was then connected to the electromagnetic array. A Gauss meter was used to ensure that the magnetic field strength at a 1cm height above the electromagnets was between 23 Gauss to 40 Gauss. Each electromagnet received an average voltage of 2.4V to 3V.
